# Supplementary material for: PG545, a Heparan Sulfate Mimetic, Reduces Heparanase Expression In Vivo, Blocks Spontaneous Metastases and Enhances Overall Survival in the 4T1 Breast Carcinoma Model
Source: PLOS journal article supplement (doi:10.1371/journal.pone.0052175), 2012-12-26
Supplement: S6 (10.1371/journal.pone.0052175.s006) [file journal.pone.0052175.s006]

**Supplementary Table S1:** Toxicities associated with PG545 in mouse, rat and dog studies.

| Species | Study                           | Dose (mg/kg)            | Frequency | Duration (weeks) | HED* (mg)                  | Bodyweight Change Over Study Duration (%) | Comments                                                                                                                                                                   |
|---------|---------------------------------|-------------------------|-----------|------------------|----------------------------|-------------------------------------------|----------------------------------------------------------------------------------------------------------------------------------------------------------------------------|
| Mouse   | Tolerance/PK (naive)            | 20                      | q.w.      | 4                | 98                         | -4.5%                                     | Piloerection and cold touch on days 2-3.                                                                                                                                   |
|         |                                 | 20 (d1) & 10 (d8,16,22) | q.w.      | 4                | 98 (d1), &49 (d8, 16 & 22) | 14.1                                      | Piloerection and cold touch on days 2-3.                                                                                                                                   |
|         |                                 | 15                      | q.w.      | 4                | 73                         | 10.8                                      | Piloerection and cold touch on days 2-3.                                                                                                                                   |
| Mouse   | 4T1 study (non-surgical)        | 15                      | 2 q.w.    | 2                | 73                         | 5.2                                       | Mild Piloerection.                                                                                                                                                         |
|         |                                 | 20                      | 2 q.w.    | 2                | 98                         | -1.3                                      | Mild Piloerection.                                                                                                                                                         |
|         |                                 | 25                      | 2 q.w.    | 2                | 122                        | -4.7                                      | Mild Piloerection.                                                                                                                                                         |
| Mouse   | 4T1 study (mastectomy/survival) | 20 x2, 10 x6            | q.w.      | 8                | 98 x2, 49 x 6              | -11.8                                     | Moderate Piloerection.<br>Mild rapid breathing (day 33-55).                                                                                                                |
| Mouse   | Non-GLP Acute Toxicity          | 50                      | Single    | 2                | 826                        | 2.5                                       | No observable adverse effect level (NOAEL).                                                                                                                                |
| Rat     | GLP Repeat Dose Toxicity        | 3                       | q.w.      | 4                | 29                         | 26.4                                      | NOAEL.                                                                                                                                                                     |
|         |                                 | 12                      | q.w.      | 4                | 116                        | 25.1                                      | ↑ cholesterol, triglycerides, WBC, liver & kidney weights associated with vacuolation of tissues, injection site reactions.                                                |
|         |                                 | 48                      | q.w.      | 4                | 465                        | 24.6                                      | ↑ cholesterol, triglycerides, WBC, APTT, liver & kidney weights associated with vacuolation of tissues, injection site reactions. ↓platelets.                              |
| Dog     | GLP Repeat Dose Toxicity        | 2.5                     | q.w.      | 4                | 83                         | 15.3                                      | Lowest observable adverse effects level (LOAEL).                                                                                                                           |
|         |                                 | 7.5                     | q.w.      | 4                | 250                        | 13.1                                      | ↑ temperature, cholesterol, triglycerides, liver & kidney weights associated with vacuolation of tissues, injection site reactions.                                        |
|         |                                 | 20                      | q.w.      | 4                | 660                        | 12.6                                      | ↑ temperature, cholesterol, triglycerides, WBC, APTT, liver & kidney weights associated with vacuolation of tissues, injection site reactions. ↓RBC indices and platelets. |

\* HED= Human Equivalent Dose taken from FDA Guidance for Industry on Estimating the Maximum Safe Starting Dose in Initial Clinical Trials for Therapeutics in Adult Healthy Volunteers (<http://www.fda.gov/downloads/Drugs/.../Guidances/UCM078932.pdf>)
